# Supplementary material for: The biological activity of bispecific trastuzumab/pertuzumab plant biosimilars may be drastically boosted by disulfiram increasing formaldehyde accumulation in cancer cells
Source: PubMed Central journal article supplement (PMC6838051; doi:10.1038/s41598-019-52507-9), 2019-11-07
Supplement: 41598_2019_52507_MOESM1_ESM.pdf [file 41598_2019_52507_MOESM1_ESM.pdf]

**The biological activity of bispecific trastuzumab/pertuzumab plant biosimilars may be drastically boosted by disulfiram increasing formaldehyde accumulation in cancer cells**

Tatiana V. Komarova<sup>1,2,‡</sup>, Ekaterina V. Sheshukova<sup>1,‡</sup>, Ekaterina N. Kosobokova<sup>3</sup>, Vyacheslav S. Kosorukov<sup>3</sup>, Anastasia V. Shindyapina<sup>1,2,&</sup>, Fedor A. Lipskerov<sup>1,2</sup>, Polina S. Shpudeiko<sup>1,2</sup>, Tatiana E. Byalik<sup>4</sup> and Yuri L. Dorokhov<sup>1,2\*</sup>

<sup>1</sup>Vavilov Institute of General Genetics Russian Academy of Sciences, 119991, Moscow, Russia

<sup>2</sup>A.N. Belozersky Institute of Physico-Chemical Biology, Lomonosov Moscow State University, 119991 Moscow, Russia

<sup>3</sup>Blokhin Cancer Research Center, 115478 Moscow, Russia

<sup>4</sup>I.M.Sechenov First Moscow State Medical University, 119991 Moscow, Russia

**Supplementary Table 1.** Oligonucleotides used for cloning and qRT-PCR.

| Name                         | Sequence                                    |
|------------------------------|---------------------------------------------|
| VLC-Pert_BsaI_dir            | GGTCTCAGATATACAAATGACAC                     |
| VLC-Pert_Acc65I_rev          | CTATACTTTCGGACAGGGTACC                      |
| VLC-Tras_linker_BsaI_rev     | CCATCTGTCTTCATCGATATGAGACC                  |
| SP-mAbs_NcoI_dir             | CCATGGGATGGAGCTGTATCATC                     |
| VHC-Pert_link_end_BsaI_dir   | GGTCTCAGCCCCAGTGTTTTTGAGGTACAACCTTGTGGAG    |
| HC-const_ApaI_rev            | CGGCAAGCACTAAGGGCCC                         |
| VHC-Tras_link_start_BsaI_rev | CTTCTATGCTATGGACGTGGCCTCAACTAAAGGCCCTGAGACC |
| RPL32_dir                    | CATCTCCTTCTCGGCATCA                         |
| RPL32_rev                    | AACCCTGTTGTCAATGCCTC                        |
| ALDH2_dir                    | TGCTATGATGTGTTTGGAG                         |
| ALDH2_rev                    | TTCTTATGAGTTCTTCTGAGG                       |
